# Supplementary material for: A monolithically integrated, intrinsically safe, 10% efficient, solar-driven water-splitting system based on active, stable earth-abundant electrocatalysts in conjunction with tandem III–V light absorbers protected by amorphous TiO2 films
Source: Royal Society of Chemistry journal article supplement (doi:10.1039/c5ee01786f), 2015-01-01
Supplement: c5ee01786f1.pdf [file c5ee01786f1.pdf]

1 Supporting Information

2 **A Monolithically Integrated, Intrinsically Safe, 10%**  
3 **Efficient, Solar-Driven Water-Splitting System Based**  
4 **on Active, Stable Earth-Abundant Electrocatalysts in**  
5 **Conjunction with Tandem III-V Light Absorbers**  
6 **Protected by Amorphous TiO<sub>2</sub> Films**

7 *Erik Verlage,<sup>[a,b]</sup> Shu Hu,<sup>[a,c]</sup> Rui Liu,<sup>[a]</sup> Ryan J. R. Jones,<sup>[a]</sup> Ke Sun,<sup>[a,c]</sup>*

8 *Chengxiang Xiang,<sup>[a]\*</sup> Nathan S. Lewis,<sup>[a,c]\*</sup> Harry A. Atwater<sup>[a,b]\*</sup>*

9

---

10 [a] Joint Center for Artificial Photosynthesis (JCAP)  
11 California Institute of Technology  
12 Pasadena, CA, 91125

13 [b] Department of Applied Physics and Materials Science  
14 California Institute of Technology  
15 Pasadena, CA, 91125

16 [c] Division of Chemistry and Chemical Engineering  
17 California Institute of Technology  
18 Pasadena, CA, 91125

19  
20  
21  
22  
23 \*To whom correspondence should be addressed: [haa@caltech.edu](mailto:haa@caltech.edu), [nslewis@caltech.edu](mailto:nslewis@caltech.edu) and

24 [cxx@caltech.edu](mailto:cxx@caltech.edu)

## 25 **Materials and Methods**

26

### 27 Chemicals and materials

28

29 All materials were used as received, except where otherwise noted. H<sub>2</sub>O with a  
30 resistivity of 18.2 MΩ·cm was obtained from a Millipore de-ionized water system. A 1.0  
31 M aqueous solution of KOH (semiconductor grade, Sigma-Aldrich, 99.99% trace metal  
32 basis) was prepared for all electrochemical measurements. Inlet and outlet ports (PEEK,  
33 0.30" ID and 0.0625" OD) used in prototypes were purchased from Upchurch Scientific  
34 (Oak Harbor, WA 98277). The Ag-based conductive epoxy was obtained from  
35 CircuitWorks from ITW Chemtronics (Kennesaw, GA 30152).

36

### 37 Growth and preparation of III-V surfaces

38

39 The dual junction device was grown commercially (Sumika Electronic Materials,  
40 Inc.) according to specifications determined by 1-D numerical simulation using  
41 Helmholtz-Zentrum Berlin's AFORS-HET software. Planar III-V layers were grown  
42 epitaxially by metal-organic chemical vapour deposition (MOCVD) on an n<sup>+</sup>-GaAs wafer  
43 with a (100)-oriented polished surface (Si-doped, acceptor concentration of  $1 \times 10^{19} \text{ cm}^{-3}$ ,  
44 6" diameter).

45

### 46 Atomic layer deposition (ALD)

47

48 Films were deposited on the exposed p<sup>+</sup>-GaAs epilayer at 150 °C using an  
49 Ultratech Fiji 200 plasma atomic-layer deposition (ALD) system. Prior to ALD, the  
50 epitaxial surface was immersed for 30 s in 1.0 M KOH (aqueous solution of potassium  
51 hydroxide pellets, semiconductor grade, 99.99% trace metals basis, Sigma-Aldrich),

52 rinsed with copious amounts of deionized H<sub>2</sub>O, dried using a stream of N<sub>2</sub>(g), and loaded  
53 immediately thereafter into the ALD chamber. Each ALD cycle consisted of a 0.06 s  
54 pulse of H<sub>2</sub>O (18 MΩ·cm resistivity, Millipore), followed by a 0.25 s pulse of  
55 tetrakis(dimethylamido)titanium (TDMAT, Sigma-Aldrich, 99.999%, used as received).  
56 A 15 s purge under a constant 0.13 L min<sup>-1</sup> flow of research-grade Ar (g) was performed  
57 between each precursor pulse. The base pressure during the TiO<sub>2</sub> growth was maintained  
58 at ~0.1 Torr. ALD-TiO<sub>2</sub> films with thicknesses of 62.5 nm and 150 nm were used to  
59 protect III-V surfaces.

60

#### 61 Deposition of metal films and electrocatalysts

62

63 Ohmic contact to the n<sup>+</sup>-GaAs wafer was formed using a Ge-Au eutectic (20 nm  
64 Ge/ 30 nm Au/ 15 nm Ni/ 100 nm Au) deposited by radio-frequency (RF) sputtering and  
65 annealed under N<sub>2</sub>(g) at 400 °C for 30 s using rapid thermal annealing. Solid-state  
66 devices were formed by RF sputtering a metal grid of 100 nm thick Ni onto the p<sup>+</sup>-GaAs  
67 surface. For all photoanode surfaces, an optically transparent nominally 2 nm thick Ni  
68 film was deposited on TiO<sub>2</sub> using RF sputtering. Counter electrodes were formed by drop  
69 casting Ni-Mo nanoparticles on Ni foil and annealing under forming gas (5% H<sub>2</sub>, 95% N<sub>2</sub>,  
70 500 sccm, Airliquide) at 450 °C for 30 min, then cooling the electrodes to room  
71 temperature under forming gas.<sup>1</sup> For the fully integrated prototype, a Ti/Ni-Mo  
72 electrocatalyst was deposited using RF sputtering onto the Au-Ge back contact.

73

#### 74 PEC assembly and device preparation

75

76 To measure the current density during photoelectrochemical operation, wafers  
77 were cleaved into samples 0.5~1 cm<sup>2</sup> in area, and samples were mounted onto a Cu film  
78 using a Ag-based conductive epoxy. Samples were then assembled into custom-made

79 compression cells that were equipped with fluorosilicone O-rings (0.0314 cm<sup>2</sup> Teflon,  
80 0.34 cm<sup>2</sup> polymethyl methacrylate).

81 The prototype (Fig. 4a) consisted of: 1x PEC assemblies (10.0 mm x 10.0 mm), 2  
82 x AHA-type NEOSEPTA anion exchange membrane (2 x 10 mm), 2 x acrylic chassis  
83 that were 3-D printed, 1 x quartz window (15 mm in diameter), 8 x inlet and outlet ports  
84 (PEEK, ID 0.75 mm, OD 1.5875 mm), and 16 x bolts (2-56" x 1") and/or epoxy (Loctite  
85 9460, Hysol).

86 All transparent sections of the compression cells were covered using high-  
87 performance black masking tape purchased from Thorlabs to prevent illumination of  
88 electrochemically inactive surfaces.

89

#### 90 AM 1.5 illumination and spectral response

91

92 A Xe lamp-based solar simulator and probe station was used to measure the solid-  
93 state device performance. The light intensity was adjusted based on an NREL-calibrated  
94 Si photovoltaic reference cell. For photoelectrochemical experiments, the illumination  
95 intensity was calibrated by placing a Si photodiode (Thor Labs) in the Teflon  
96 compression cell, in the same location occupied by the exposed area of the  
97 photoelectrode. The Si photodiode was previously calibrated by measurement of the  
98 short-circuit current-density value under AM 1.5 simulated sunlight at 100 mW cm<sup>-2</sup> (1-  
99 Sun) of irradiance from a Xe arc lamp with an AM 1.5 filter. To obtain spectral response  
100 data, monochromatic light was chopped at 17 Hz and was focused onto the sample  
101 surface. An unchopped light-emitting diode (LED) was used to saturate the  
102 AlGaAs/GaAs heterojunction (850 nm) or the InGaP homojunction (405 nm), to measure  
103 the external quantum yield of the unsaturated subcell. Photoelectrochemical spectral  
104 response data were obtained at the formal potential for water oxidation using a side-  
105 facing chassis with a 0.34 cm<sup>2</sup> O-ring.

106

107 Electrochemical measurements

108

109 A saturated calomel electrode (SCE, CH Instruments) was used as a reference  
110 electrode for all three-electrode photoelectrochemical measurements, including spectral  
111 response data. The pH of the 1.0 M KOH(aq) solution was 13.7, as measured using a  
112 VWR SympHony SB70P Digital, Bench-model pH Meter. The equilibrium potential for  
113 water oxidation in 1.0 M KOH(aq) was calculated to be 0.18 V vs. SCE. The active cell  
114 area was determined by the size of the O-ring. For stability tests the custom-built Teflon  
115 compression cell (Fig. 2b) O-ring size was 0.031 cm<sup>2</sup>, and a liquid pumping system was  
116 used to facilitate removal of bubbles from the sample surface and to decrease mass  
117 transfer effects. All data for three-electrode electrochemical measurements in aqueous  
118 solutions included compensation for solution series resistance as obtained from high-  
119 frequency electrical-impedance measurements.

120

121 Scanning electron microscopy (SEM) of device failure

122 For all samples, device failure was followed by a large increase in current density  
123 caused by a breach in the TiO<sub>2</sub> protective film that led to photocorrosion of the III-V  
124 layers. Lateral corrosion of the III-V device caused cracks in the TiO<sub>2</sub> that would  
125 eventually lead to liftoff of the protection layer, as can be seen in Fig. S1a.

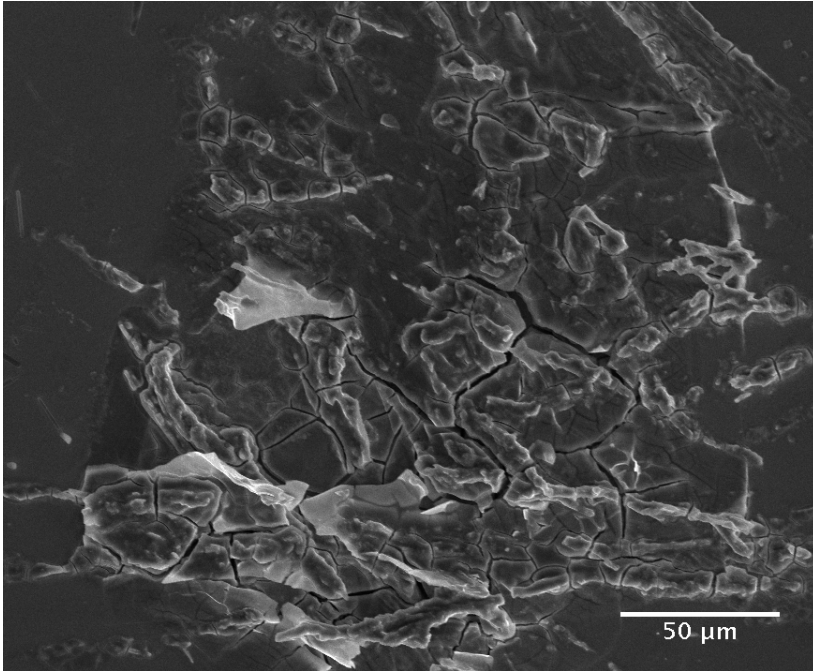

126

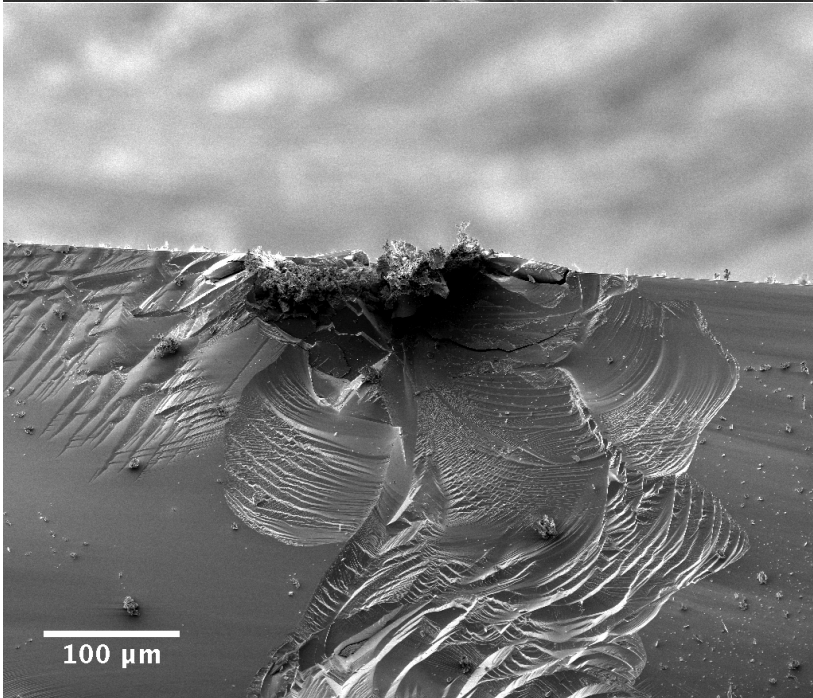

127

128 **Figure S1** (a) SEM image of device failure after 6.5 hours of operation, showing  
129 cracking of ALD-TiO<sub>2</sub> protection layer and corrosion of underlying III-V semiconductors.

130 (b) Side profile SEM of III-V corrosion.

131

132 Eudiometer gas collection

133

134 A custom-built polymethyl methacrylate (PMMA) chassis with anion exchange  
135 membrane partitions was used to separate the gas products. A system of Teflon tubing at  
136 the top of each chamber allowed  $\text{H}_2(\text{g})$  and  $\text{O}_2(\text{g})$  to flow into two eudiometers (0.05 mL  
137 precision) that were filled with de-ionized water and suspended over large water  
138 reservoirs. To prevent escape of hydrogen gas through the solution, the reservoir for  
139  $\text{H}_2(\text{g})$  collection was saturated with pure  $\text{H}_2(\text{g})$  for 30 min before operation..

140 The gas collection apparatus for the fully integrated prototype is shown in Fig. 4b.  
141 The respective conduits transported gas products from the chassis chambers to the  
142 eudiometers (inverted burette geometry), terminating at the water reservoir level to insure  
143 that the chassis continuously operated at STP without any buildup of backpressure. High  
144 precision manometers (Extech HD755) were used to sample the pressure variation inside  
145 the eudiometers due to increasing gas volume every second. The pressure was measured  
146 in inches water column, resulting in a well-defined meniscus velocity during the  
147 experiment. A simple conversion factor between the eudiometer length and the  
148 eudiometer volume allowed determination of the gas production rate (ml/s) from  
149 measurement of the meniscus velocity (in/s). As produced gases were introduced to the  
150 inverted burette and the water level decreased, the pressure of the gases inside the burette  
151 increased. An additional conversion factor was applied to obtain the volume of produced  
152 gas at STP, which was used to obtain the solar-to-hydrogen conversion efficiency in  
153 Figure 4b.

154 The chassis in Figure 3a was also used for gas collection to determine the faradaic  
155 efficiency of the system, as shown in Figure S2. The current density from spontaneous  
156 water splitting was measured at zero external bias under 1.5 Sun illumination from a Xe  
157 arc lamp with an AM 1.5 filter. This system was used to calculate the expected gas  
158 production. Measurements were made at regular intervals for over a 5 h period. The  
159 Faradaic efficiency was 100% for  $\text{O}_2(\text{g})$ , and was 90% for  $\text{H}_2(\text{g})$  collection, due to

160 hydrogen leaks in the chassis and tubing. The final products were analyzed using gas  
161 chromatography (GC) by thermal conductivity detectors (TCD), and the composition of  
162 the products was confirmed as well with a  $\sim 2\%$  gas crossover rate.

163

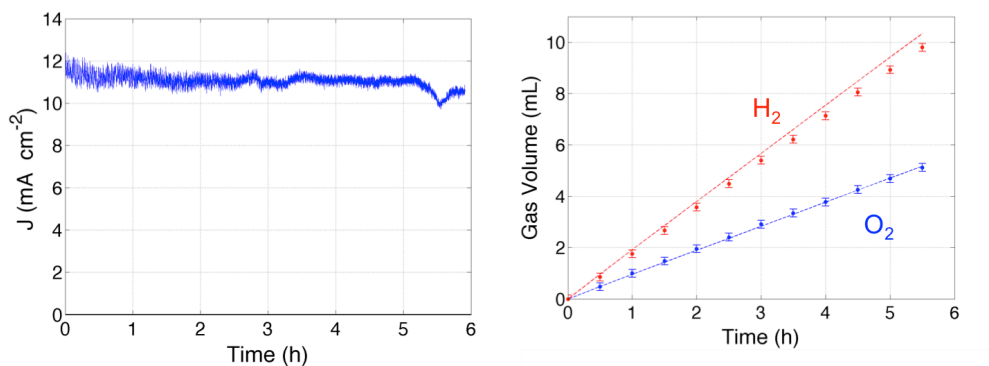

164

165 **Figure S2** (a) Short-circuit photocurrent density  $J_{\text{photo, short}}$  under 1.5 Suns using AM 1.5  
166 illumination. (b) Gas volume was measured at regular intervals, and is compared to  
167 expected gas production (dotted lines) based on total charge passed.

168

### 169 Spectroscopic ellipsometry

170

171 Complex refractive index ( $n, k$ ) data for films of as-grown  $\text{TiO}_2$  on Si were  
172 obtained using spectroscopic ellipsometry. The ellipsometric data were acquired using a  
173 J.A. Woolam V-VASE system. The non-absorbing ( $k \sim 0$ ) portion of the data was fit using  
174 a Cauchy model that assumed a  $\text{TiO}_2/\text{SiO}_2$  bilayer structure on Si. The  $\text{TiO}_2$   $n, k$  values  
175 were extracted from a point-by-point fit, using fixed Cauchy and film-thickness  
176 parameters.

177

### 178 Optical modeling

179

180 Reflection spectra of tandem III-V substrates with  $\text{TiO}_2$  coatings of different  
181 thicknesses were calculated by solving the transfer matrix (Figure S3a). Refractive



182 indices of all the layers were obtained or interpolated from experimental data at  
183 <http://www.ioffe.ru/SVA/NSM/nk/>. The refractive index of protective TiO<sub>2</sub> from atomic  
184 layer deposition was obtained from spectroscopic ellipsometry. The Matlab function  
185 (*multidiel*), developed by Sophocles J. Orfanidis from Rutgers University, was used to  
186 calculate the reflection responses of the isotropic lossy multilayer dielectric structures<sup>2</sup>.  
187 The structural information used in the calculation is shown in Figure 1a.

188

### 189 UV-vis reflectance and transmittance measurement

190

191 The optical reflectance of the TiO<sub>2</sub> and Ni metal-coated TiO<sub>2</sub>/III-V tandem  
192 substrates (Figure S3b) were determined by using an integrating sphere at normal  
193 incidence (Agilent Cary 5000 UV-Vis spectrometer). The absorptance ( $A$ ) of TiO<sub>2</sub>-  
194 coated tandem junction substrates was calculated from the measured total reflectance ( $R$ )  
195 and transmittance ( $T$ ) of the electrode as  $A = 1 - R - T$ . All optical measurements were  
196 performed in air on fresh samples without chemical/electrochemical treatment. These  
197 results were used to select a TiO<sub>2</sub> anti-reflection coating thickness that increased current  
198 density in the current-limiting InGaP cell while still providing a thick conformal coverage  
199 of to serve as a protection layer.

200

201

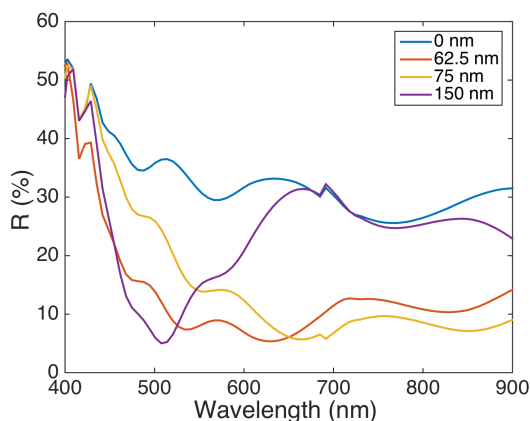

202

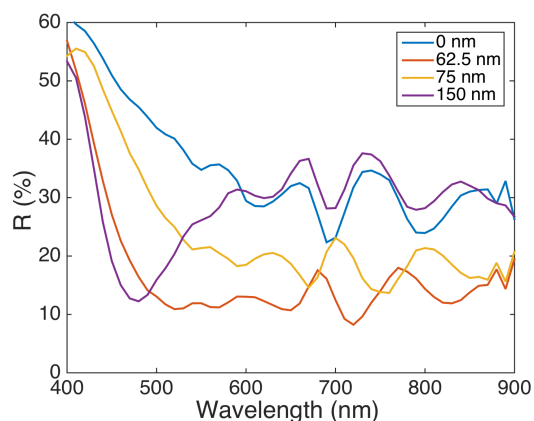

203 **Figure S3.** Reflectance of GaAs/InGaP structure with varying thicknesses of TiO<sub>2</sub> that  
204 serves as a single-layer anti-reflection coating. (a) Optical model. (b) Integrating sphere.

205

206

## 207 **Discussion**

208

### 209 External quantum yields of solid-state and PEC cells

210

211 The EQE of solid state and photoelectrochemical cells, shown in Fig. 1a and Fig.  
212 2a, are not optimal and have room for improvement in future designs. Dual junction  
213 GaAs/InGaP devices in literature include double layer anti-reflection coatings (DLARCs)  
214 with optimized indices of refraction and thicknesses for a III-V layer stack. Many of these  
215 DLARCs are unstable in alkaline electrolyte or are unsuitable for operation in a planar  
216 PEC device. The solid-state measurements reported herein were obtained without any  
217 surface treatment or anti-reflection coating, which results in reflection losses of ~30% for  
218 most wavelengths in the solar spectrum. The behavior of the photoelectrode benefits  
219 slightly from being submerged in solution that has a higher index of refraction than air, as  
220 well as from the TiO<sub>2</sub> coating which acts as a (sub-optimal) single-layer anti-reflection  
221 coating (ARC). A second cause of reduced EQE is parasitic absorption by the 7 nm GaAs  
222 contact layer, which absorbs photons that have energies above the band gap of GaAs,  
223 1.42 eV. The presence of this layer was needed to obtain facile for hole conduction  
224 through the TiO<sub>2</sub> protection layer, since ALD-TiO<sub>2</sub> grown on window layers that  
225 contained exposed aluminum did not exhibit the desired electrical properties. Simulations  
226 indicated that parasitic absorption of short wavelength light was especially detrimental to  
227 the performance of the high bandgap InGaP cell.

228

229

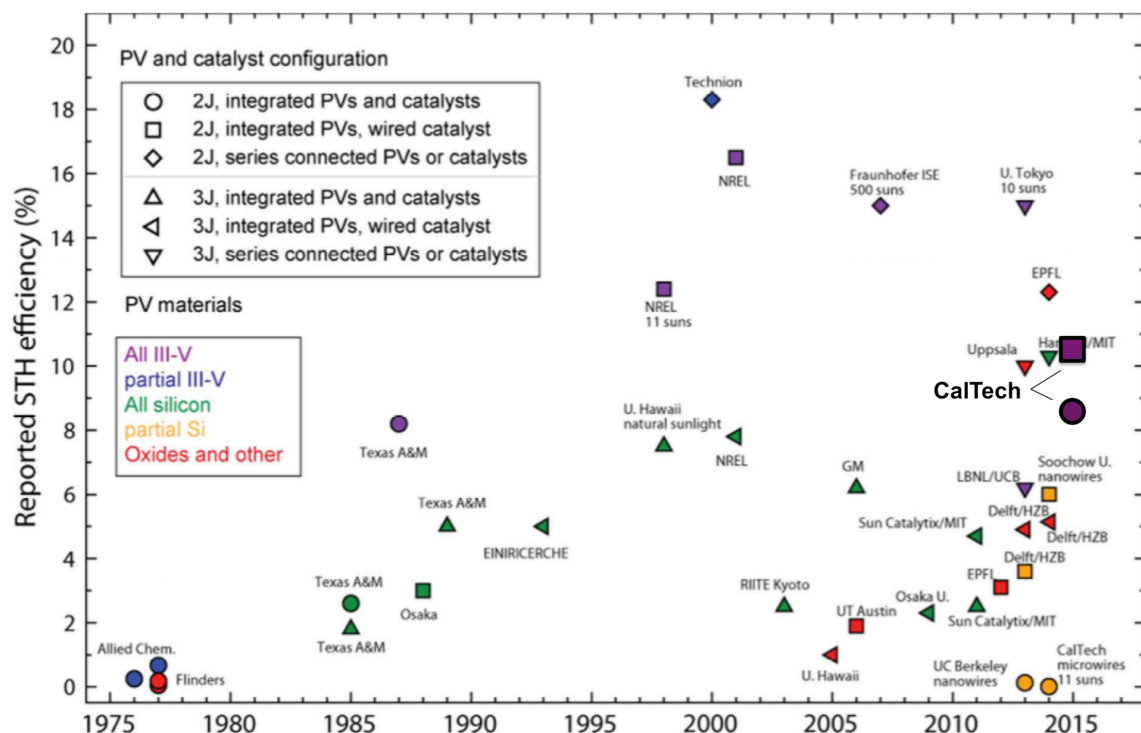

230

231 **Figure S4.** A compilation of reported solar-to-hydrogen (STH) efficiencies.<sup>3</sup> New entries  
 232 (bold) indicate the efficiency of the 2J, integrated, III-V devices reported in the main text.

233

234 Operational Criteria for Safe, Efficient Electrolyzers:

235 Commercial electrolyzers must meet several criteria to be considered safe and  
 236 reliable for operation and sale into the marketplace. They must be intrinsically safe, and  
 237 not produce a flammable, potentially explosive mixture of H<sub>2</sub>(g) and O<sub>2</sub>(g) in the reactor  
 238 at any point in space or time, especially because the reactor contains active catalysts for  
 239 the recombination of the gases and is operating in the presence of light and heat.

240 Electrolyzers must be able to withstand pressure differentials without undesirable  
 241 crossover of gases or flooding and flow of the liquid electrolyte across the membrane  
 242 separator, because the stoichiometry of the evolved H<sub>2</sub> and O<sub>2</sub> is 2:1. The membrane  
 243 must be able to hold back pressure because a pressure differential is required to  
 244 beneficially collect the H<sub>2</sub>(g) in a pipeline, as opposed to evolving the gas at atmospheric

245 pressure in a laboratory demonstration device. The photoelectrochemical systems  
246 described herein satisfy these same design and operational constraints in full.

247 Both modeling/simulation results and experimental data have shown that  
248 electrolyzers operated in solutions buffered to near-neutral pH are inefficient and/or not  
249 intrinsically safe. For example, operation of a membrane-free near-neutral pH a-Si:H  
250 device with ITO protective layers and earth-abundant, high overpotential electrocatalysts  
251 at  $\eta_{\text{STH}} = 3.2\%$  produced 10% O<sub>2</sub>(g) in the cathode chamber and up to 40% H<sub>2</sub>(g) in the  
252 anode chamber, presenting an explosion hazard.<sup>4</sup> Introduction of a membrane was shown  
253 to yield a large reduction in the system efficiency and resulted in significant pH gradients  
254 near the electrode surfaces. Further modeling and simulation has shown that steady-state  
255 operation in such a geometry even in buffered solutions will result in pH gradients  
256 between the anode and cathode that produce local pH changes near the electrode surfaces,  
257 due to the consumption of protons associated with evolution of H<sub>2</sub>(g) from water and  
258 concomitant production of protons associated with production of O<sub>2</sub>(g) from H<sub>2</sub>O.<sup>4,5</sup> The  
259 overpotentials associated with the pH gradients and electro dialysis exceeded the  
260 combined overpotentials associated with the oxygen-evolving and hydrogen-evolving  
261 electrocatalysts, precluding the construction of an efficient (photo)electrolysis system.  
262 Further modeling and simulation efforts have shown that active convection by bubble  
263 evolution, for example, can minimize the formation of pH gradients but results in the loss  
264 of intrinsic safety, due to the concomitant co-evolution of stoichiometric, potentially  
265 explosive, mixtures of H<sub>2</sub>(g) and O<sub>2</sub>(g) at atmospheric pressure in the reaction vessel, in  
266 the presence of active catalysts for the recombination of these gases as well as in the  
267 presence of light and heat.<sup>5</sup>

268

269

270 **Video**

271

272 Full operation of the monolithically integrated 1 cm<sup>2</sup> prototype performing unassisted  
273 water splitting is available for download along with this publication.

274

275

276 1. J. R. McKone, B. F. Sadtler, C. A. Werlang, N. S. Lewis and H. B. Gray, *ACS Catalysis*, 2012,  
277 3, 166-169.

278 2. S. J. Orfanidis, *Electromagnetic waves and antennas*, 2014.

279 3. J. W. Ager III, M. Shaner, K. Walczak, I. D. Sharp and S. Ardo, *Energy Environ. Sci.*, 2015,  
280 DOI: 10.1039/C5EE00457H.

281 4. J. Jin, K. Walczak, M. R. Singh, C. Karp, N. S. Lewis and C. X. Xiang, *Energy Environ. Sci.*,  
282 2014, 7, 3371-3380.

283 5. M. R. Singh, K. M. Papadantonakis, C. Xiang and N. Lewis, *Energy Environ. Sci.*, 2015, DOI:  
284 10.1039/C5EE01721A.

285

286
